# Supplementary material for: Millennial-scale faunal record reveals differential resilience of European large mammals to human impacts across the Holocene
Source: PubMed Central journal article supplement (PMC4822451; doi:10.1098/rspb.2015.2152), 2016-03-30

**Fig. S2.** Reconstructed mammal species range maps for each Holocene archaeological period.

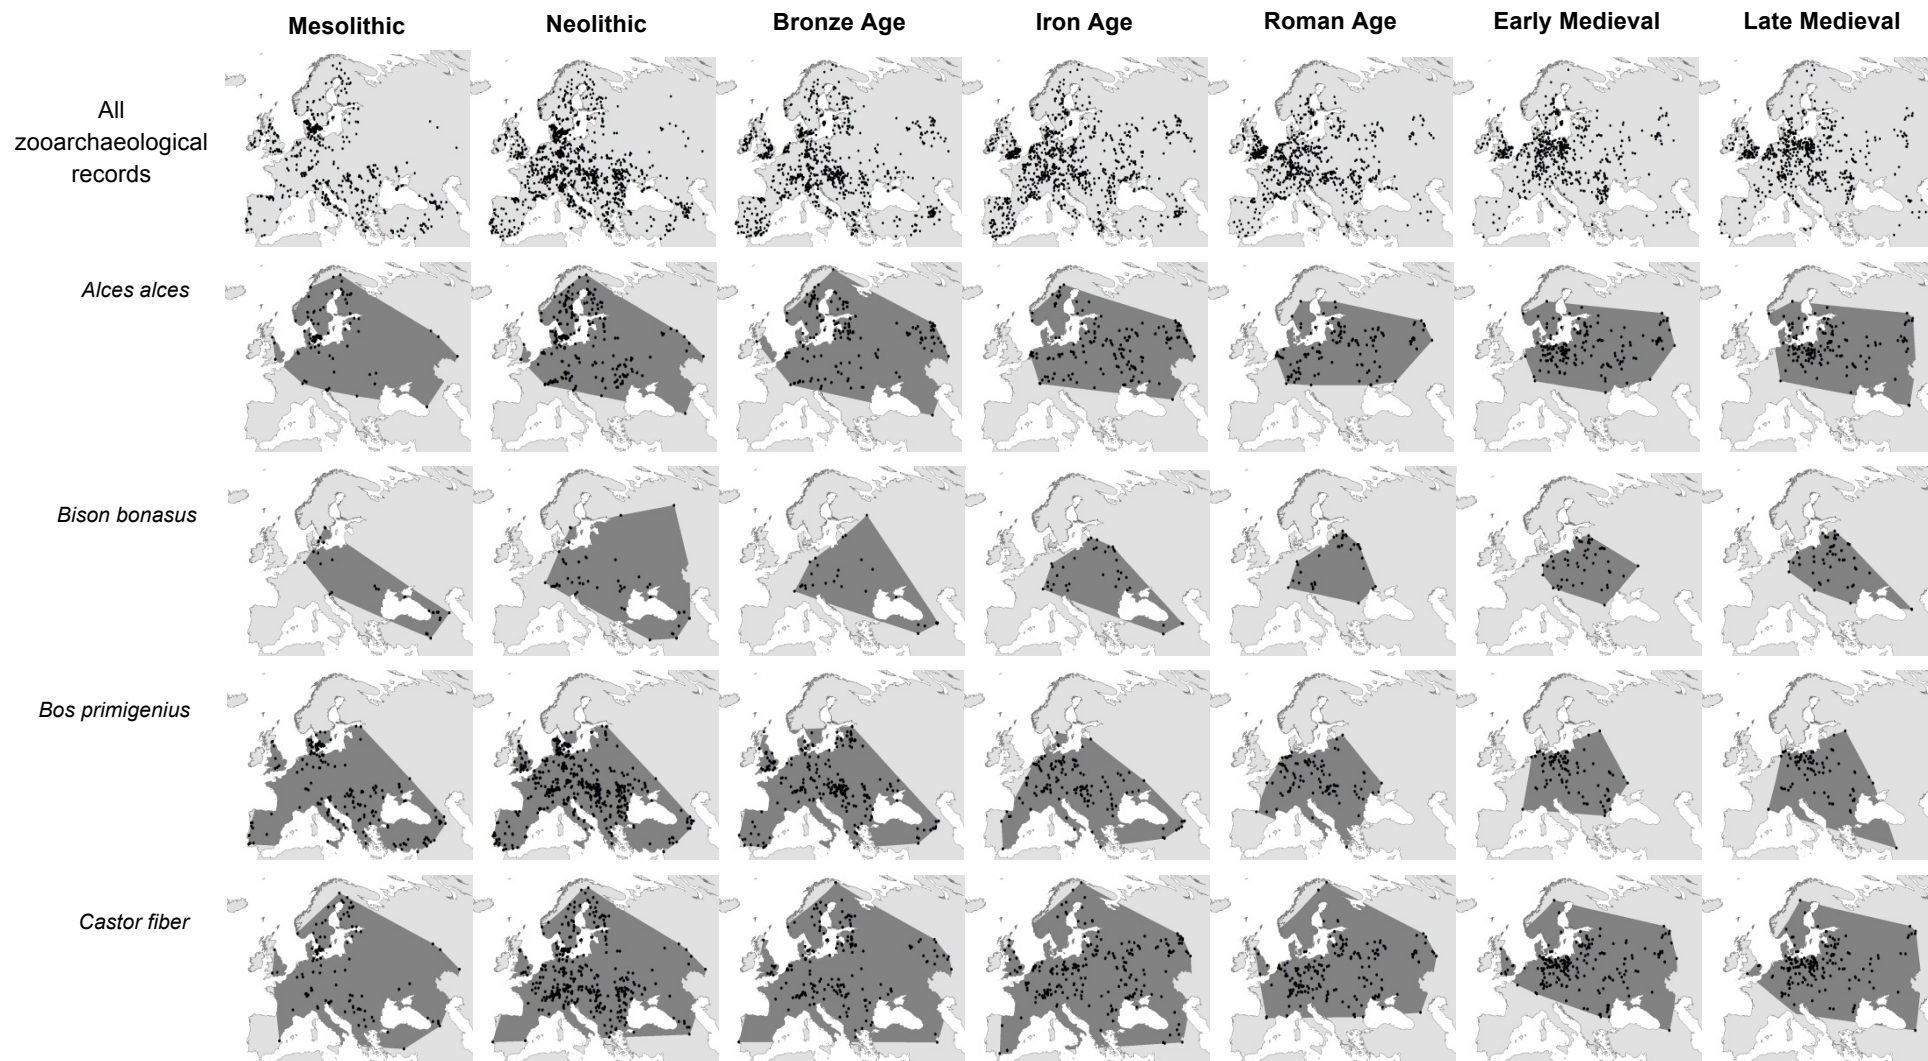

*Ursus arctos*

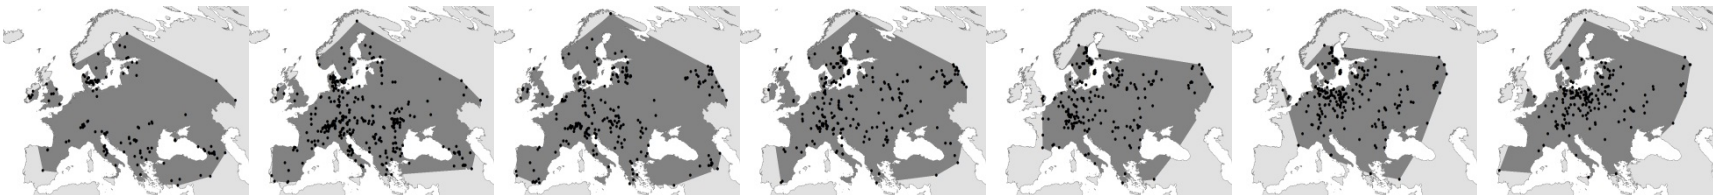

*Martes martes*

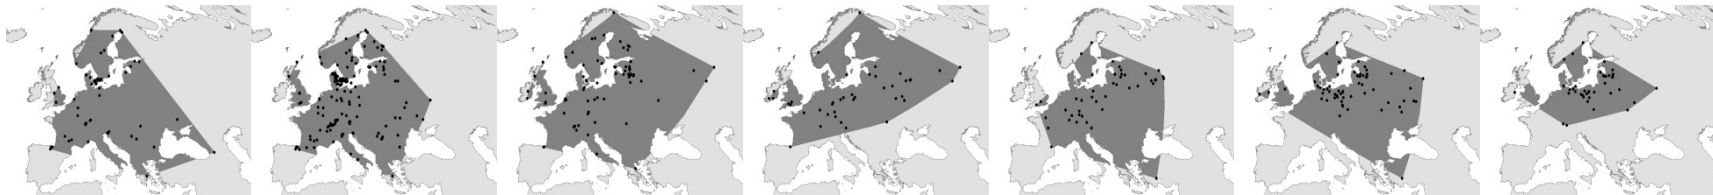

*Mustela putorius*

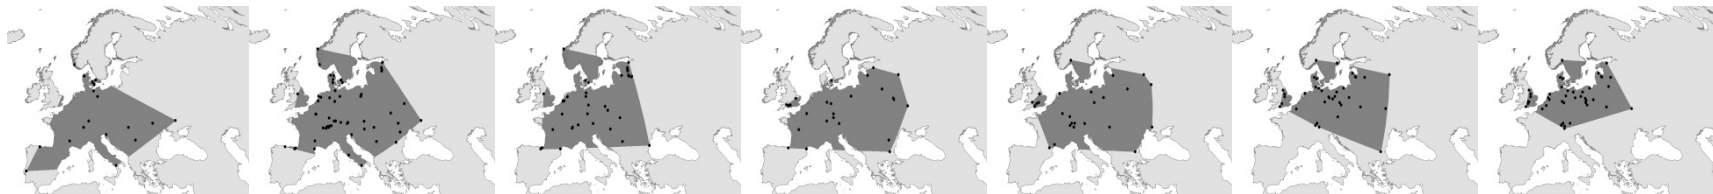

*Sus scrofa*

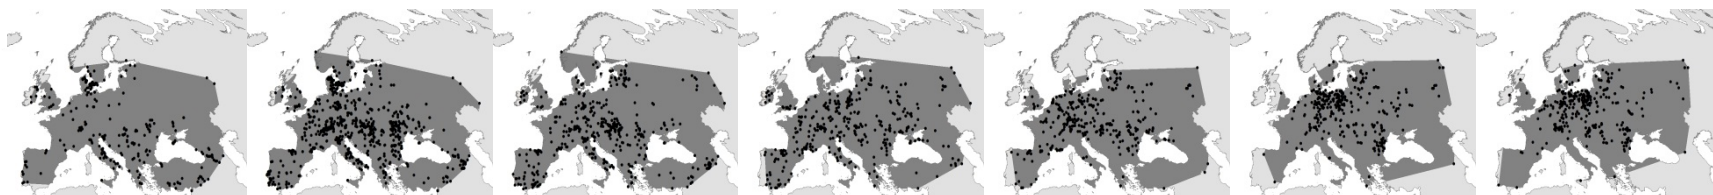

*Canis lupus*

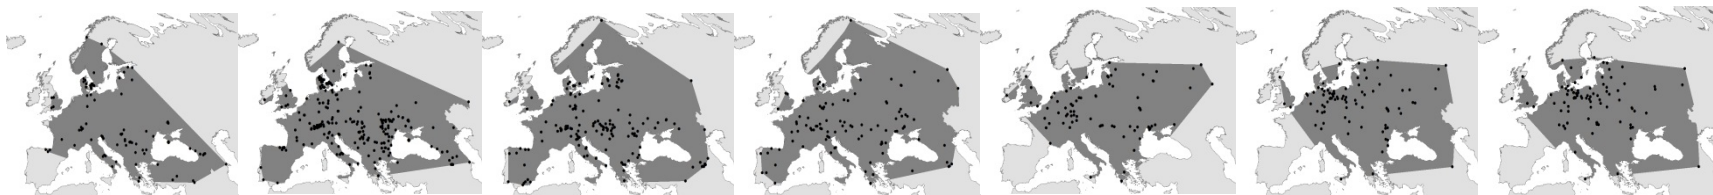

*Capreolus capreolus*

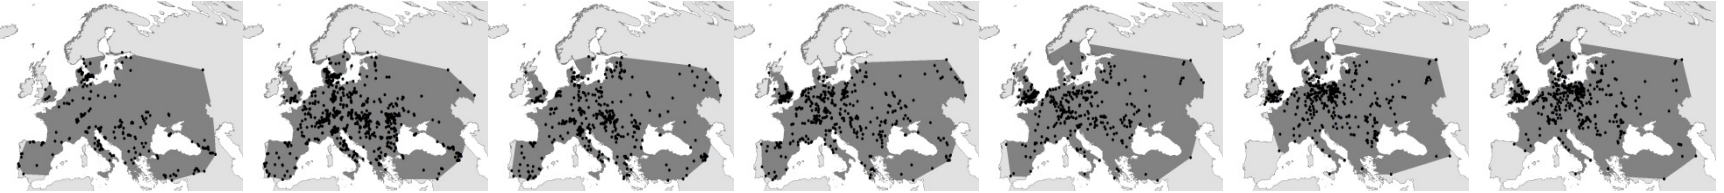

*Cervus elaphus*

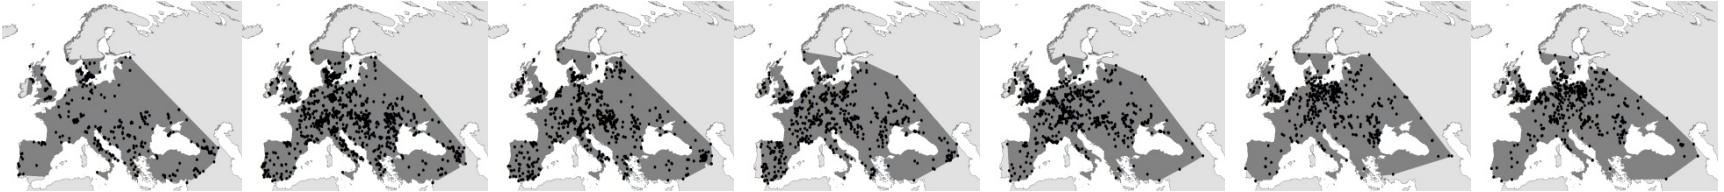

*Felis silvestris*

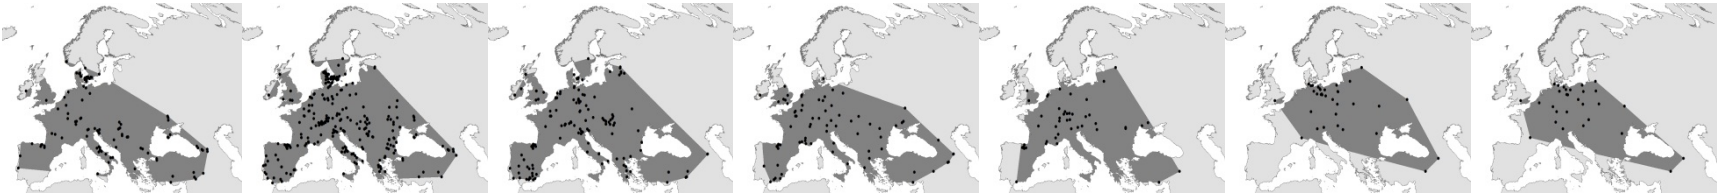

*Lynx lynx*

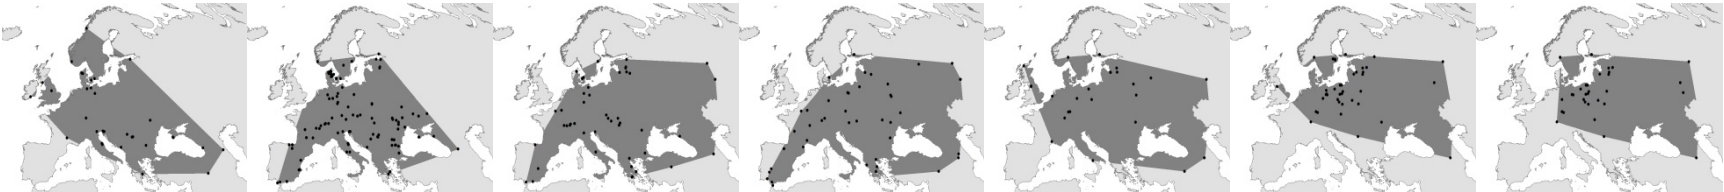

*Martes foina*

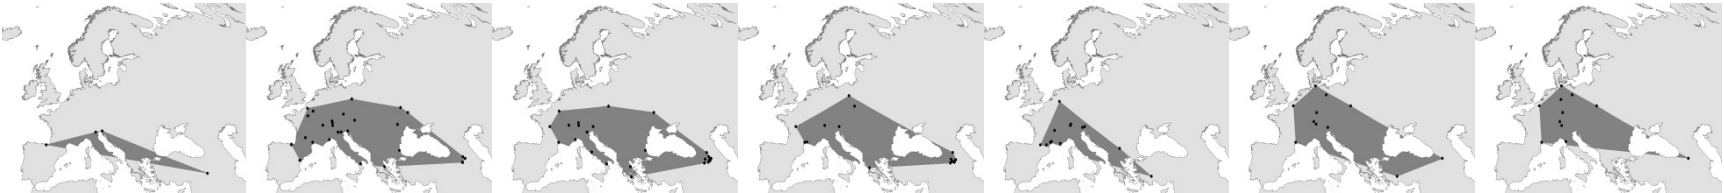

*Vulpes vulpes*

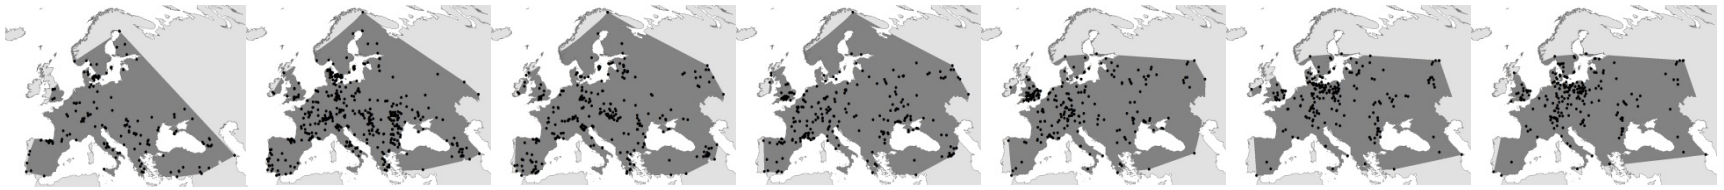

Supplement: rspb20152152supp4.pdf [file rspb20152152supp4.pdf]
